# Supplementary material for: Achieving a high open-circuit voltage of 1.339 V in 1.77 eV wide-bandgap perovskite solar cells via self-assembled monolayers
Source: Royal Society of Chemistry journal article supplement (doi:10.1039/d3ee02839a), 2023-11-10
Supplement: d3ee02839a1.pdf [file d3ee02839a1.pdf]

## Supporting Information

### **Achieving a high open-circuit voltage of 1.339 V in 1.77-eV wide-bandgap perovskite solar cells via self-assembled monolayers**

Zongjin Yi<sup>1,†</sup>, Wanhai Wang<sup>2,3,†</sup>, Rui He<sup>1</sup>, Jingwei Zhu<sup>1</sup>, Wenbo Jiao<sup>1</sup>, Yi Luo<sup>1</sup>, Yuliang Xu<sup>1</sup>, Yunfan Wang<sup>4</sup>, Zixin Zeng<sup>4</sup>, Kun Wei<sup>5</sup>, Jinbao Zhang<sup>5</sup>, Sai-Wing Tsang<sup>4</sup>, Cong Chen<sup>1</sup>, Weihua Tang<sup>2,3,\*</sup>, Dewei Zhao<sup>1,\*</sup>

<sup>1</sup>College of Materials Science and Engineering & Engineering Research Center of Alternative Energy Materials & Devices, Ministry of Education, Sichuan University, Chengdu 610065, China

<sup>2</sup>Institute of Flexible Electronics (IFE, Future Technologies), College of Materials, Innovation Laboratory for Sciences and Technologies of Energy Materials of Fujian Province (IKKEM), Xiamen University, Xiamen 361005, China

<sup>3</sup>School of Chemistry and Chemical Engineering, Nanjing University of Science and Technology, Nanjing 210094, China

<sup>4</sup>Department of Materials Science and Engineering, City University of Hong Kong, 83 Tat Chee Ave, Kowloon Tong, Hong Kong SAR, China

<sup>5</sup>College of Materials, Fujian Key Laboratory of Advanced Materials, Xiamen Key Laboratory of Electronic Ceramic Materials and Devices, Xiamen University, Xiamen, China

\*Correspondence to: [dewei\\_zhao@hotmail.com](mailto:dewei_zhao@hotmail.com) and [whtang@xmu.edu.cn](mailto:whtang@xmu.edu.cn)

†These authors contributed equally.

---

## Experimental Part

### Materials

*N, N*-dimethylformamide (DMF), dimethyl sulfoxide (DMSO), toluene (TL), and  $\text{Pb}(\text{SCN})_2$  were purchased from Sigma-Aldrich. Diethyl ether (DE), anhydrous ethanol, and isopropanol (IPA) were purchased from Chengdu Chron Chemical Co., Ltd. Lead iodide ( $\text{PbI}_2$ ) and lead bromide ( $\text{PbBr}_2$ ) was purchased from TCI. Formamidinium iodide (FAI) was purchased from Greatcell Solar Company. Cesium iodide (CsI) was purchased from Alfa Aesar. Ploy(bis(4-phenyl)(2,4,6-trimethylphenyl)amine) (PTAA) was purchased from Xi'an Polymer Light Technology Corporation.  $\text{C}_{60}$  was purchased from Nano-C. BCP was purchased from Jilin OLED. Copper (Cu) was purchased from Zhongnuoxincai Co., Ltd. DCB-BPA is synthesized according to our previous work.<sup>1</sup>

### Device preparation

Patterned indium tin oxide (ITO) glass substrates ( $25 \times 25$  mm,  $10 \Omega \text{ sq}^{-1}$ ) were sequentially cleaned with detergent, deionized water, and ethanol for 15 min at each procedure in an ultrasonic bath. Before the spin-coating of HTLs, ITO glass substrates were dried by a nitrogen flow and then treated with ultraviolet ozone for 15 min. For PTAA-based devices, PTAA dissolved in toluene with a concentration of 2 mg/mL was spin-coated at 4000 rpm for 30 s and then heated on a hot plate at 100 °C for 10 min. For SAM-based devices, DCB-BPA was dissolved in anhydrous ethanol with a concentration of 0.1, 0.2, and 0.4 mg/mL, respectively. The DCB-BPA solution was spin-coated at 3000 rpm for 20 s and heated at 120 °C for 10 min. The  $\text{FA}_{0.8}\text{Cs}_{0.2}\text{PbI}_{1.8}\text{Br}_{1.2}$  perovskite precursor was prepared by dissolving 3.876 mg  $\text{Pb}(\text{SCN})_2$ , 62.4 mg CsI, 165.12 mg FAI, 264.24 mg  $\text{PbBr}_2$ , 221.28 mg  $\text{PbI}_2$  in 1 ml mixed solvent of DMF and DMSO with a volume ratio of 3:1 and stirred at 60 °C for 3 h before use. For the preparation of complete devices, 80  $\mu\text{L}$  of perovskite precursor was dropped on the substrate and spin-coated through a two-step process, i.e., 500 rpm for 2 s and then 4000 rpm for 60 s. At the second stage, 700  $\mu\text{L}$  of diethyl ether was dropped after the spin-coating of 25 s. The as-prepared perovskite film was annealed at 60 °C for 3 min and 100 °C for 10 min. Then the perovskite films were treated by a TEACl solution dissolved in IPA with a concentration of 2 mg/mL at 3000 rpm for 30 s, and then followed by an additional annealing process at 100 °C for 5 min according to our previous work.<sup>2</sup> After a short cooling, all samples were transferred into a thermal evaporation chamber, and a 20 nm  $\text{C}_{60}$  layer was evaporated at  $5 \times 10^{-4}$  Pa. For the opaque device, 5nm BCP and 100 nm Cu was

---

thermally evaporated in an evaporation chamber with a vacuum degree of  $5 \times 10^{-4}$  Pa. For the semitransparent device, the deposition of ALD-SnO<sub>2</sub> was performed using tetrakis(dimethylamino) tin (IV) and deionized water as precursors. And, 180 nm IZO was sputtered at 70 W power at a pressure of 0.2 Pa. 1.25-eV narrow bandgap perovskite solar cells were fabricated according to our previous work.<sup>3</sup> The active area of the device is 0.0975 cm<sup>2</sup>, defined by the overlapped region between the back electrode and the ITO substrate.

## Analysis Methods

**Film Characterization:** XPS measurement was performed by a photoelectron spectrometer (ThermoFischer, ESCALAB Xi +) with Al-K $\alpha$  radiation ( $h\nu = 1486.6$  eV) at 12.5 kV and 16 mA. Contact angles of PTAA and DCB-BPA were measured by a contact angle analyzer (JY-82B Kruss DSA). Scanning electron microscope (SEM) images were taken by Hitachi S-5200 microscope with an acceleration voltage of 10 kV. Powder X-ray diffraction (XRD) data were obtained using a Shimadzu XRD-6100 diffractometer with Cu-K $\alpha$  radiation ( $\lambda = 1.5406$  Å) at 40 kV and 30 mA. PL and TRPL measurements of perovskite films were performed by FLS980 (Edinburgh Inc) with a 532 nm wide spectrum light source as the excitation light source. Ultraviolet Photoelectron Spectroscopy (UPS) was performed by PHI 5000 VersaProbe III with He I source (21.22 eV) under an applied negative bias of 9.0 V.

**Details of the PVSK exfoliation:** Exfoliation of the perovskite films: PMMA (Sigma-Aldrich) precursor was prepared by dissolving 0.4g PMMA in 1mL CB. Epoxy precursor was prepared by mixing diglycidyl ether bisphenol A type (Sigma-Aldrich), n-octylamine (Sigma-Aldrich) and m-xylylenediamine (Sigma-Aldrich) with a molar ratio of 4:2:1. PMMA and epoxy layer were blade coated on the prepared perovskite film in a sequential order. In order to accelerate the cross-link process of epoxy, the coated substrate was annealed at 70 °C for 10 min. After 12 hours, the epoxy was completely solidified at room temperature. Finally, perovskite film was exfoliated from glass/ITO substrate by a glass nipping plier. The micro-morphology of perovskite films bottom surface was characterized by SEM (SU-70, Japan Hitachi Nake high-tech enterprise). PL intensity (680 nm) mapping were obtained by Vis-NIR-XU (Nanophoton Corporation) with an excitation at 532 nm.

**Device Characterization:**  $J$ - $V$  curves were recorded by a Keysight Technologies B2901A source meter under simulated solar illumination (Enlitech, SS-F5-3A). The light intensity was calibrated by a silicon reference cell (SRC-00205, Enlitech). The scan rate for  $J$ - $V$  measurement was 100 mV·s<sup>-1</sup>, with a delay time of 100 ms and a voltage step of 10 mV. All

---

devices were tested using a shadow mask with an active area of 0.0576 cm<sup>2</sup> for opaque devices and 0.0624 cm<sup>2</sup> for semitransparent devices. S-Q limit calculations were performed using a freely available Python code.<sup>4</sup> The light intensity dependence of  $V_{OC}$  was obtained by measuring  $J-V$  curves under different illumination intensities. The EQE spectra were measured under monochromatic light ranging from 300 nm to 800 nm with a 10 nm increment and a chopper frequency of 210 Hz via a QE system (QE-R, Enli Tech). The MPP of the encapsulated devices were tracked by an LED (Guangzhou Cryscos Equipment Co., Ltd.) under the relative humidity of  $\sim 50\%$ . The dark  $J-V$  and SCLC was measured with a Keysight Technologies B2901A source meter under dark conditions. EIS and  $C-V$  measurements were performed by an electrochemical workstation (IVIUMSTAT). For EIS measurement, the frequency was changed from 10<sup>8</sup> Hz to 1000 Hz at the bias of 1.1 V with an amplitude of 20 mV. For  $C-V$  measurement, the frequency was fixed at 1000 Hz with the voltage range of 0 V to 1.2 V. The highly-sensitive external quantum efficiency (s-EQE) spectra of wide-bandgap perovskite solar cells were obtained by using a home-built setup. During the measurements, light from a 1000 W xenon arc lamp (Newport) passes through a monochromator (Zolix) and optical chopper (ThorLabs) before being focused on the device active area. The generated photocurrent was amplified by a current amplifier (Standard Research SR570) and then collected by a lock-in amplifier (Standard Research SR830). The intensity of the light source was measured by calibrated silicon and germanium detectors (ThorLabs). EL was measured by Enlitech REPS with a bias from 0.5 V to 2.5 V.

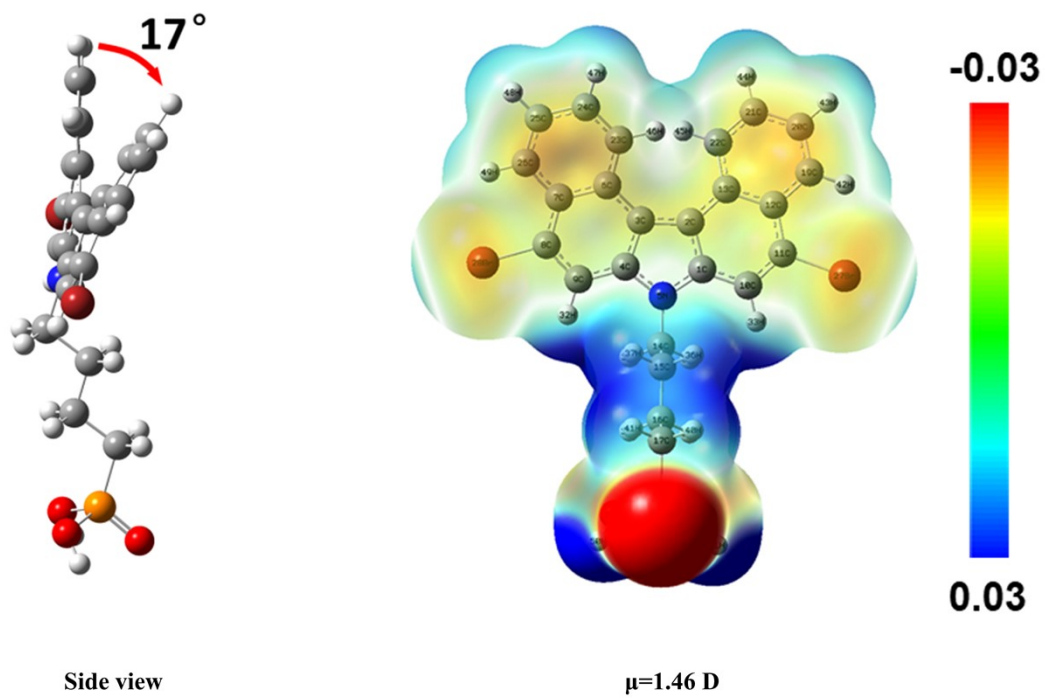

**Figure S1.** Side view and electrostatic surface potential of DCB-BPA.

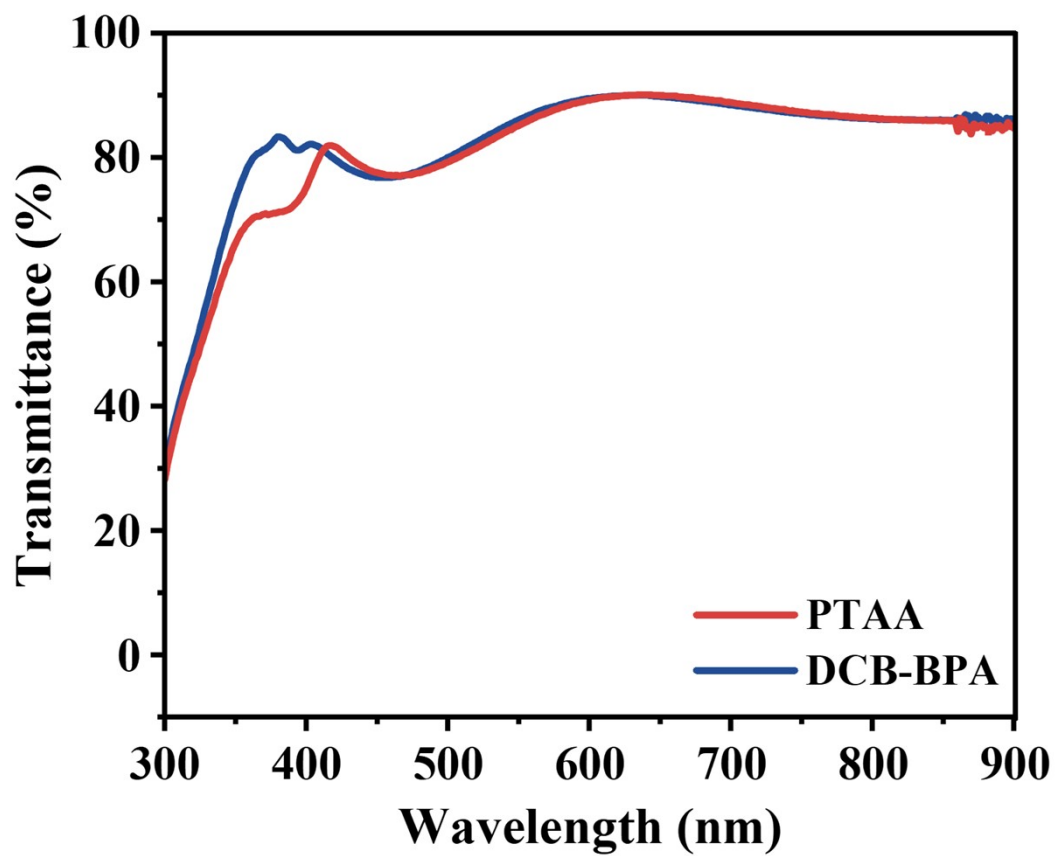

**Figure S2.** Transmittance spectra of PTAA/ITO and DCB-BPA/ITO.

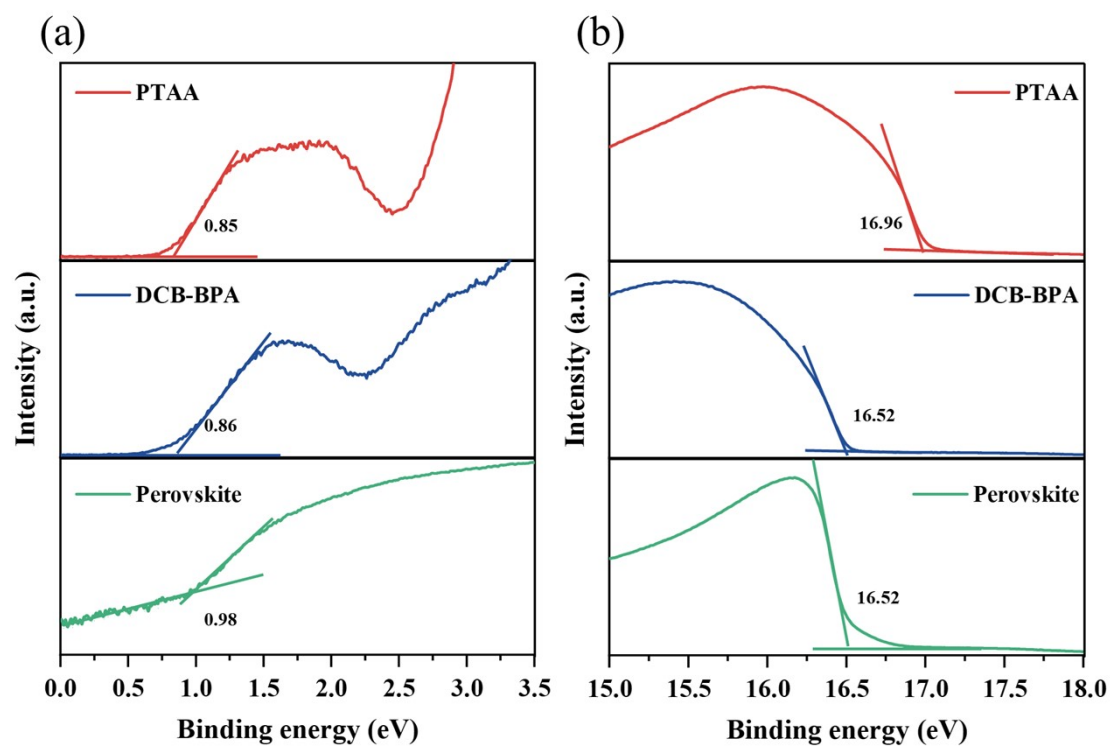

**Figure S3.** Valence band edge (a) and secondary electron cut-off edge (b) from UPS measurements of different HTLs and the 1.77-eV WBG perovskite.

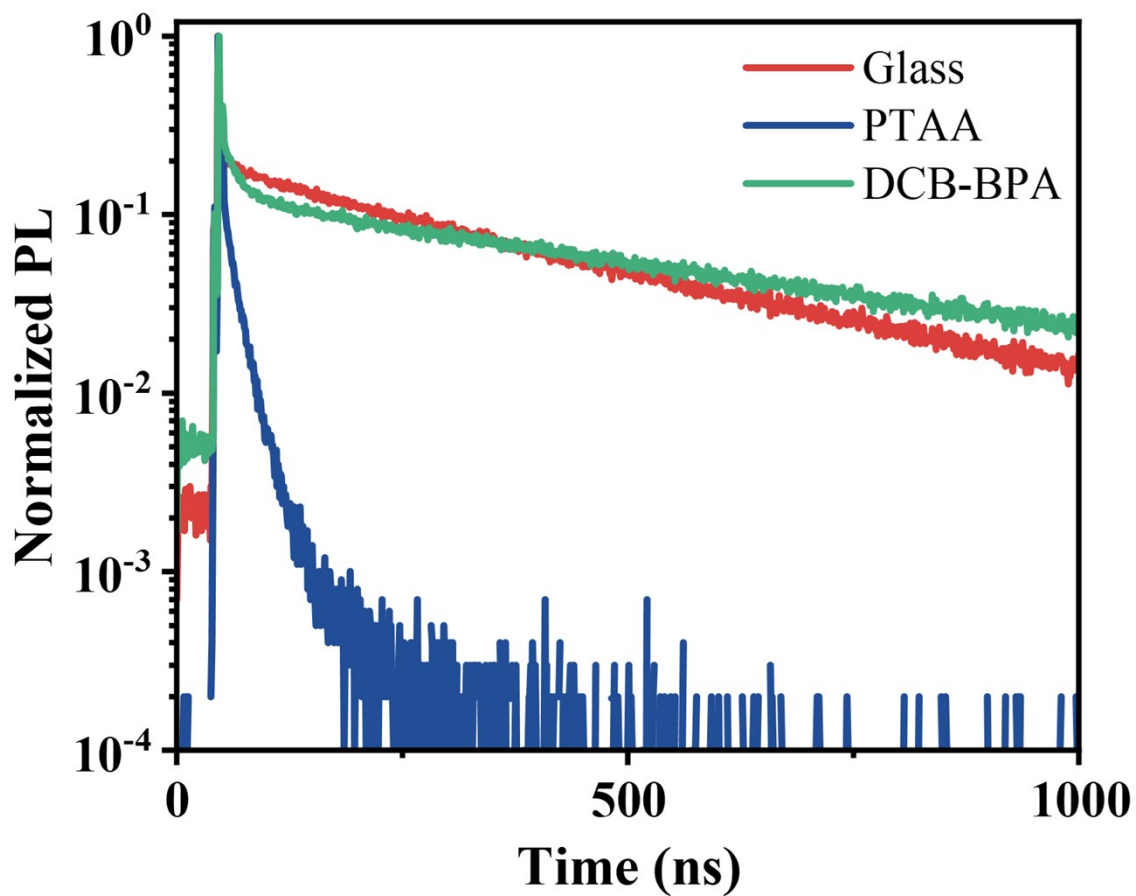

**Figure S4.** TRPL decays of perovskite films deposited on glass, PTAA, and DCB-BPA.



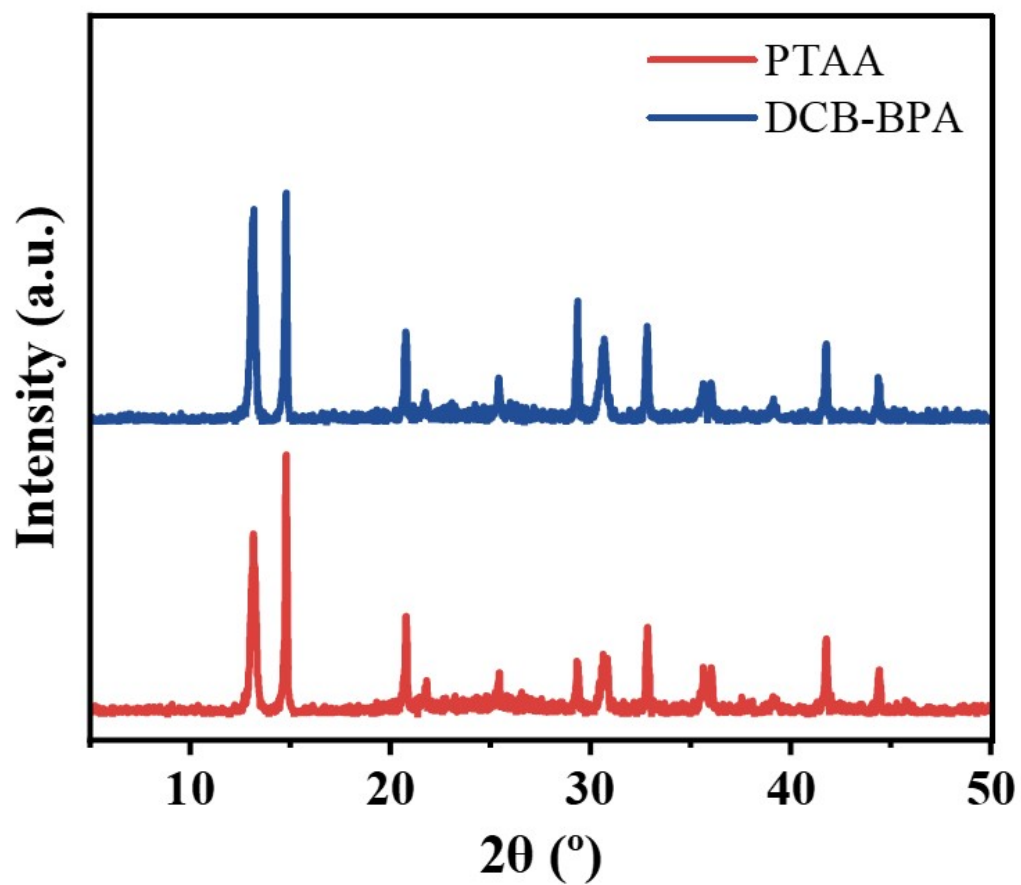

**Figure S5.** XRD patterns of WBG perovskite films deposited on PTAA and DCB-BPA.

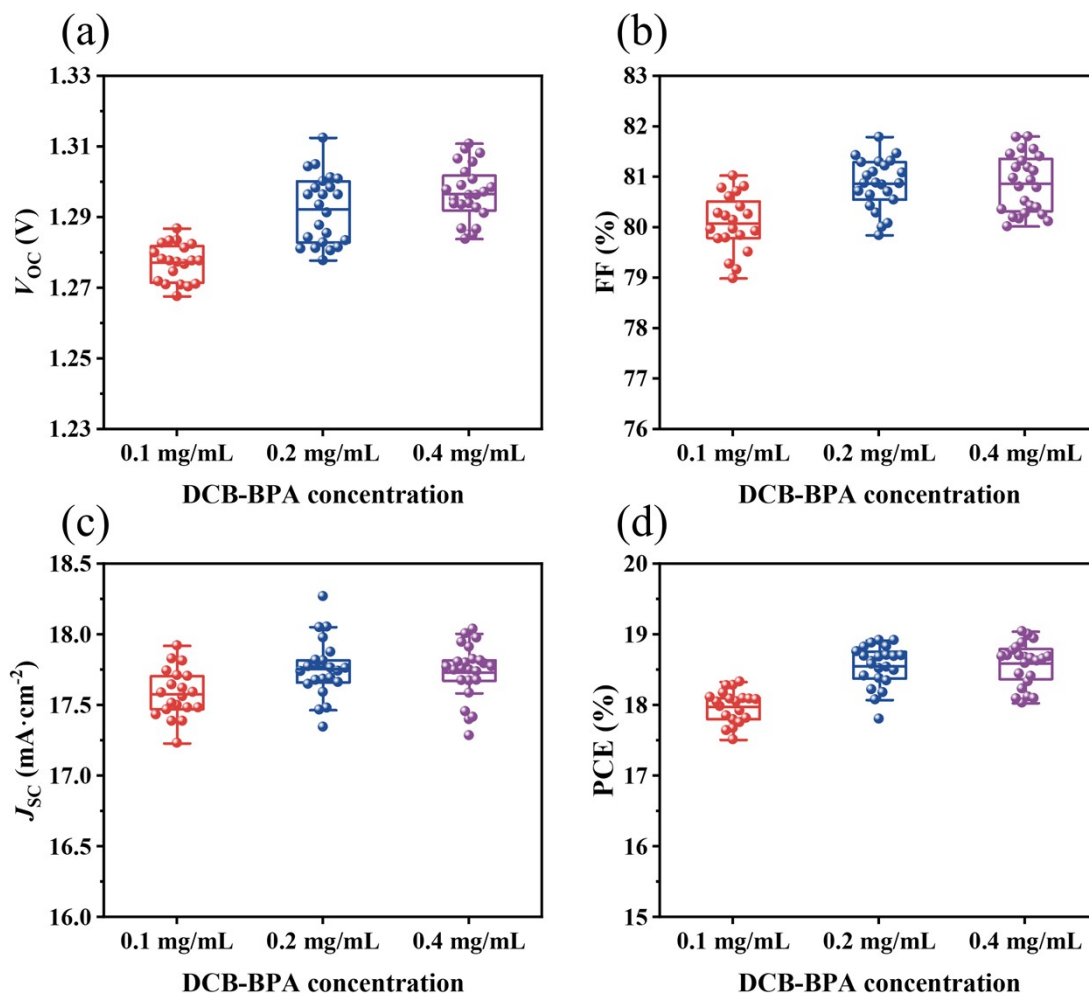

**Figure S6.** Statistics of photovoltaic parameters of devices with different concentrations of DCB-BPA. (a)  $V_{OC}$ , (b) FF, (c)  $J_{SC}$ , and (d) PCE.

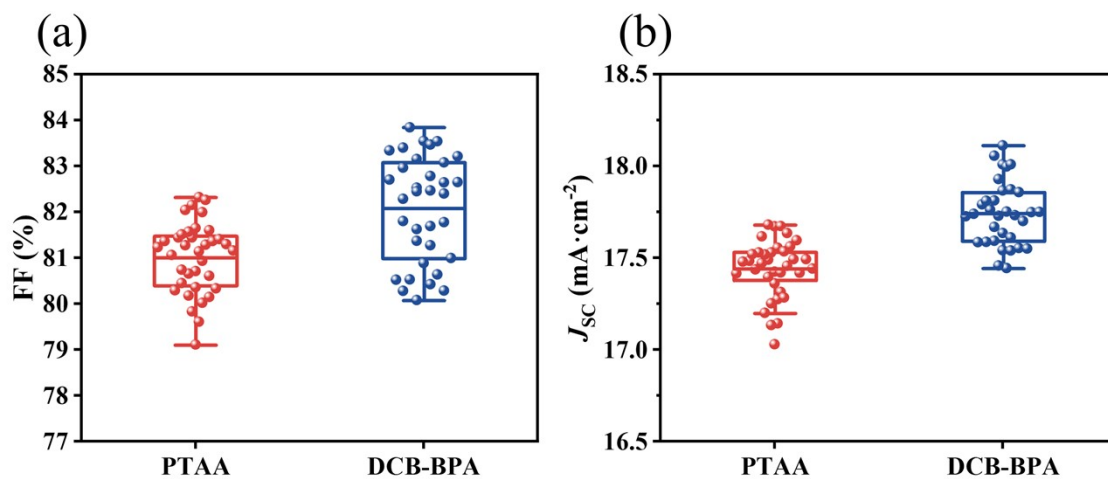

**Figure S7.** Statistics of photovoltaic parameters of devices with PTAA and DCB-BPA as HTLs. (a) FF and (b)  $J_{SC}$ .

# Measurement Report

**Client Name** Dewei Zhao's Group  
**Client Address** No.24 South Section 1, Yihuan Road, Chengdu, China, 610065  
**Sample** Wide-bandgap perovskite solar cell  
**Manufacturer** Sichuan University  
**Application** SIMITL72022110601  
**Measurement Date** 7<sup>th</sup> November, 2022

**Performed by:** *Qiang Shi*  
 Qiang Shi  
**Date:** 07/11/2022  
**Reviewed by:** *Wenjie Zhao*  
 Wenjie Zhao  
**Date:** 07/11/2022  
**Approved by:** *Zhengxin Liu*  
 Zhengxin Liu  
**Date:** 10/11/2022

The measurement report without signature and seal are not valid. This report shall not be reproduced, except in full, without the approval of SIMIT.

Report No.22TR110601

1/4

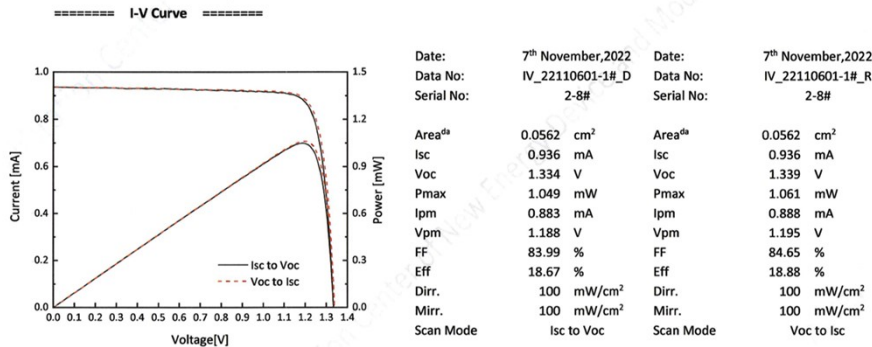

Ref. Device No. AK-200  
 Cal. Val. of Ref. 128.1mA at 100mW/cm<sup>2</sup>

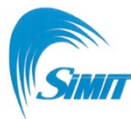

Report No.22TR110601

3/4

**Figure S8.** Measurement report of a WBG PSC certified by Shanghai Institute of Microsystem and Information Technology. The device has an independently certified PCE of 18.88% (18.67%) under reverse (forward) voltage scan.

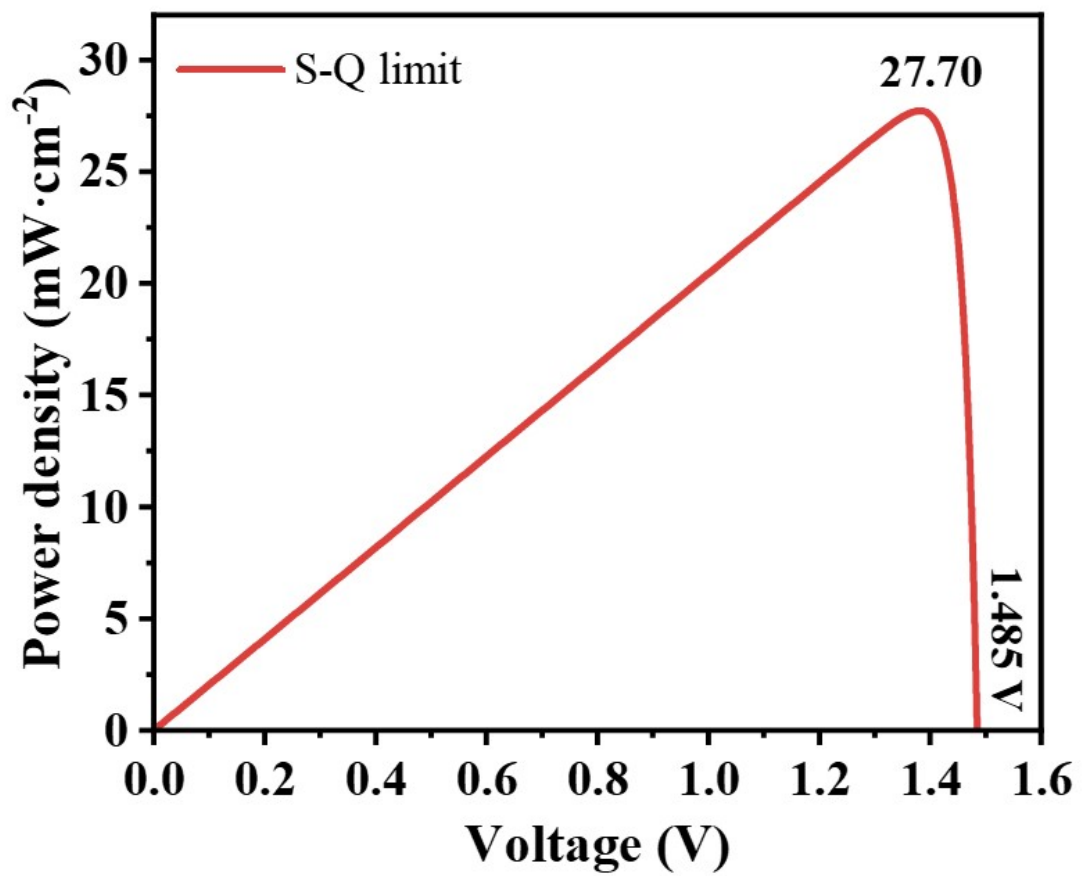

Figure S9.  $P$ - $V$  curves of S-Q limit of 1.77-eV PSCs.<sup>4</sup>

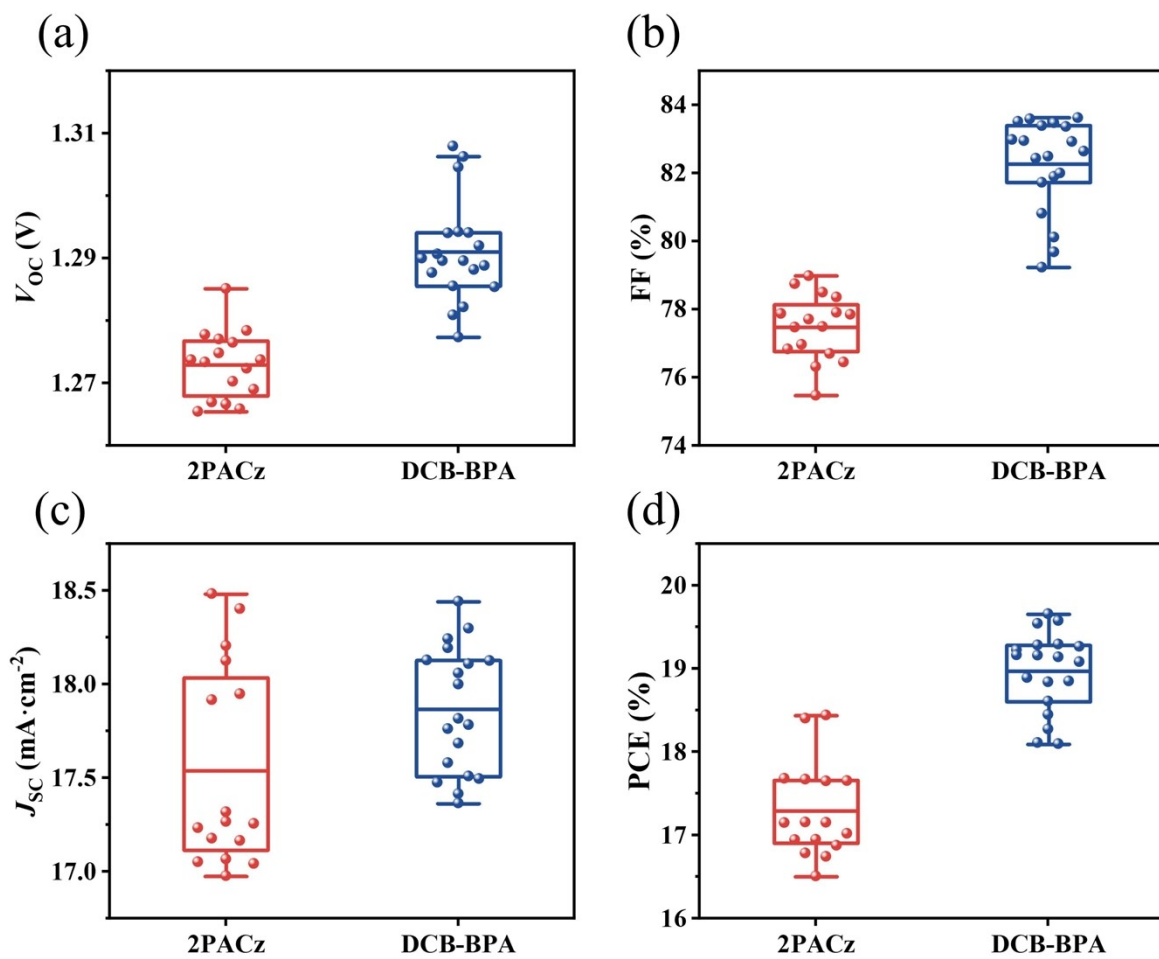

**Figure S10.** Statistics of photovoltaic parameters of devices with 2PACz and DCB-BPA as HTLs. (a)  $V_{OC}$ , (b) FF, (c)  $J_{SC}$  and (d) PCE

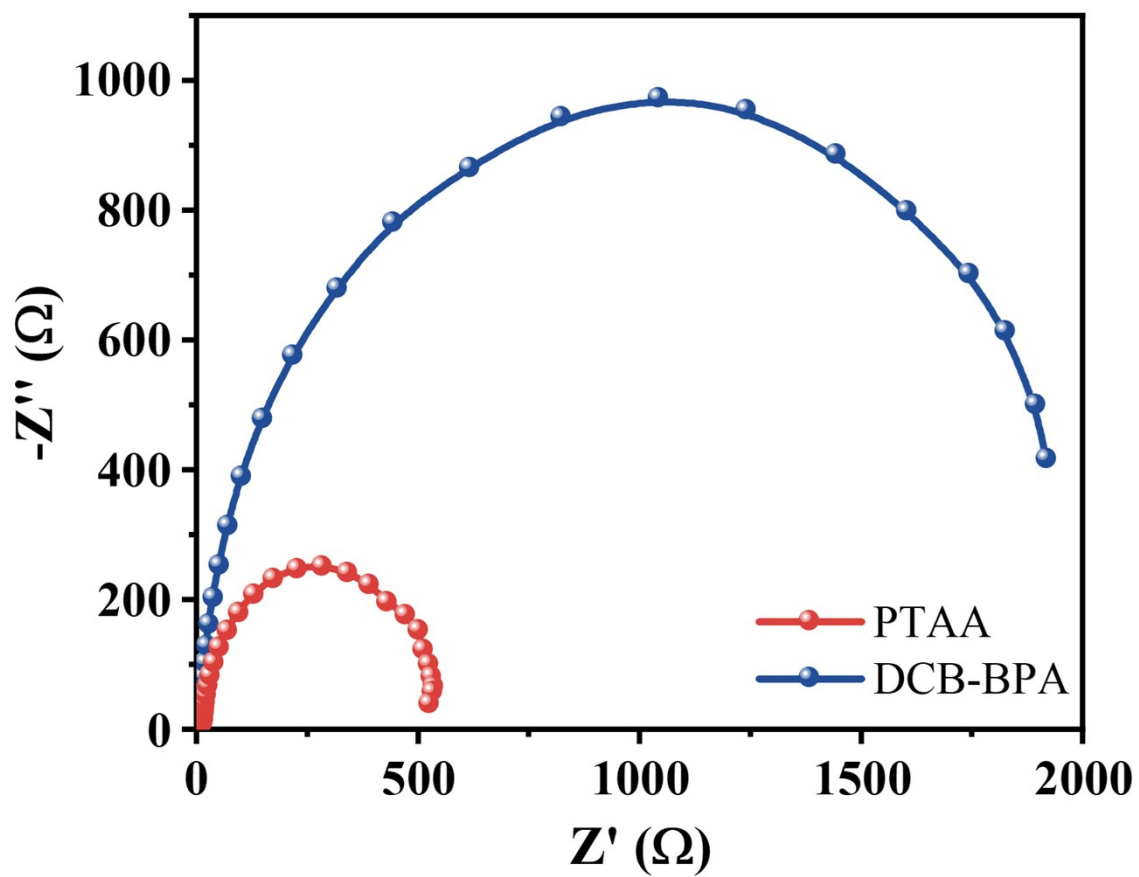

**Figure S11.** EIS of PTAA and DCB-BPA devices.

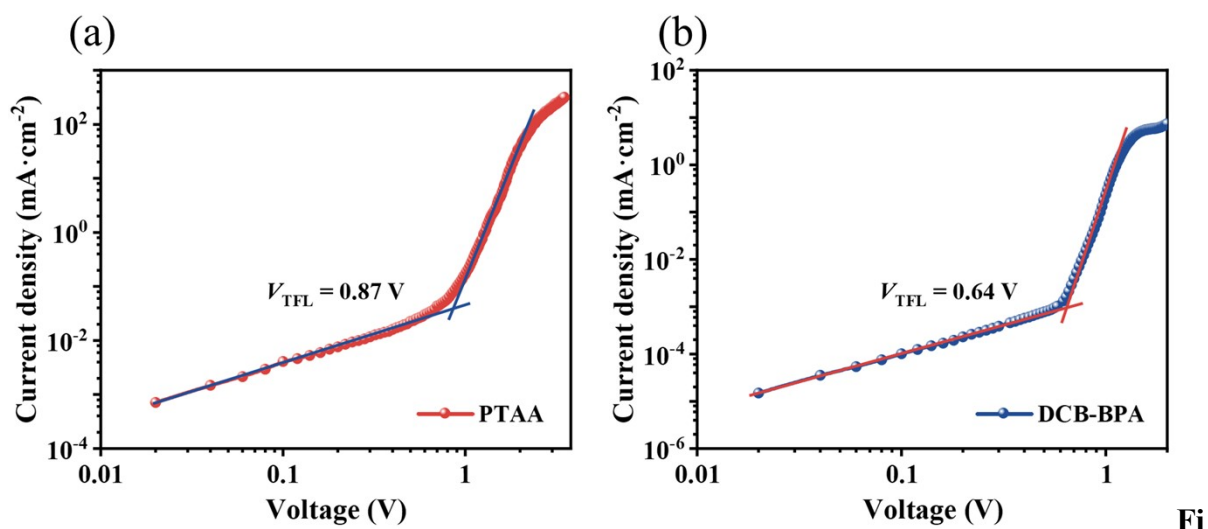

Figure S12. SCLC measurements of hole-only devices tailored by (a) PTAA and (b) DCB-BPA.

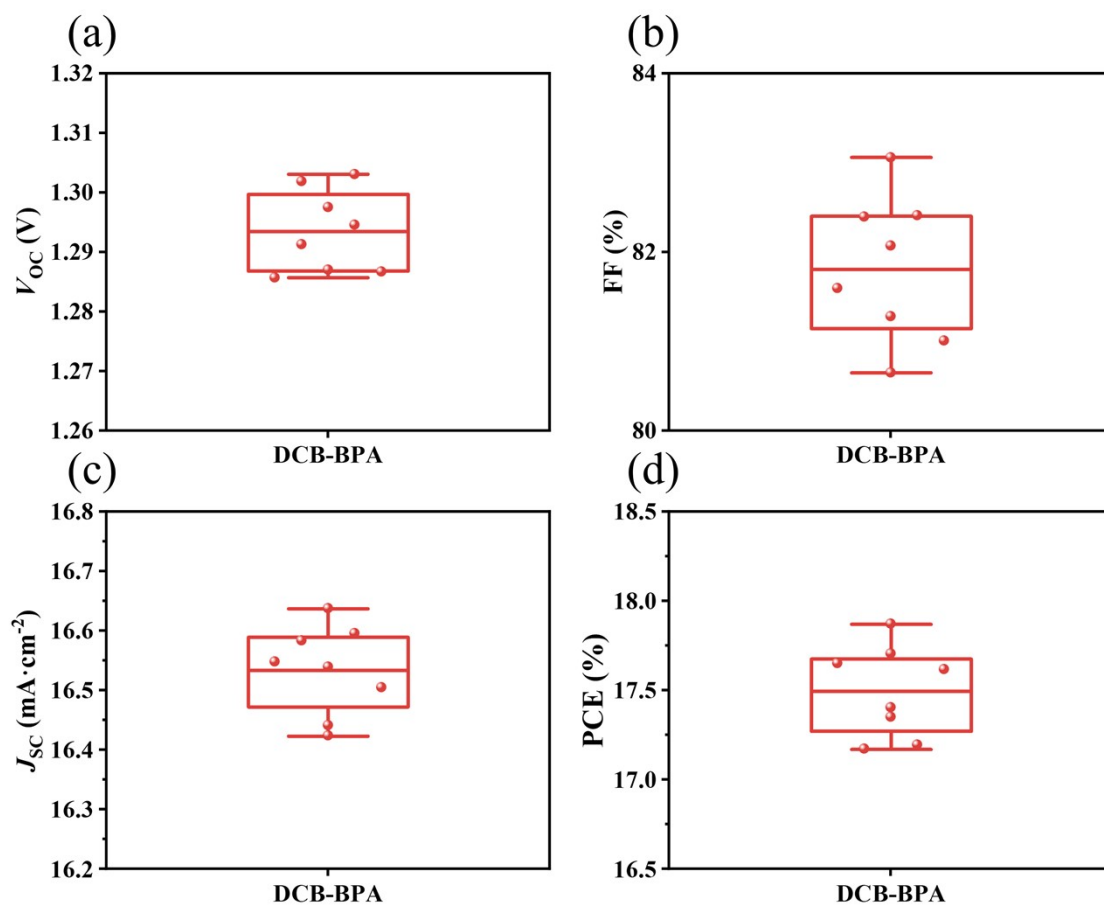

Figure S13. Statistics of photovoltaic parameters of semitransparent devices using DCB-BPA as HTL. (a)  $V_{\text{OC}}$ , (b) FF, (c)  $J_{\text{SC}}$ , and (d) PCE.



---

**Table S1.** Fitted data for TRPL decays of perovskite films on different HTLs.

|         | $\tau_1$ (ns) | $A_1$ | $\tau_2$ (ns) | $A_2$ | $\tau_{\text{ave}}$ (ns) |
|---------|---------------|-------|---------------|-------|--------------------------|
| Glass   | 111           | 0.087 | 401           | 0.913 | 375                      |
| PTAA    | 11            | 0.606 | 28            | 0.394 | 18                       |
| DCB-BPA | 19            | 0.034 | 584           | 0.966 | 564                      |

---

**Table S2.** Photovoltaic parameters of champion devices using different HTLs under forward and reverse voltage scans.

| HTL               | $V_{OC}$ (V) | FF (%) | $J_{SC}$ (mA·cm <sup>-2</sup> ) | PCE (%) |
|-------------------|--------------|--------|---------------------------------|---------|
| PTAA (forward)    | 1.20         | 80.69  | 17.67                           | 17.08   |
| PTAA (reverse)    | 1.20         | 81.28  | 17.67                           | 17.22   |
| DCB-BPA (forward) | 1.33         | 82.42  | 17.80                           | 19.52   |
| DCB-BPA (reverse) | 1.33         | 82.70  | 17.75                           | 19.53   |

**Table S3.** Photovoltaic performance metrics of state-of-the-art p-i-n WBG (> 1.75 eV) PSCs.

| Year      | Device structure | $E_g$ (eV) | $V_{oc}$ (V)                   | $V_{oc}$ loss (mV) | PCE (%)                       | Ref. |
|-----------|------------------|------------|--------------------------------|--------------------|-------------------------------|------|
| 2019      | p-i-n            | 1.75       | 1.24                           | 510                | 18.19                         | 5    |
| 2019      | p-i-n            | 1.81       | 1.21                           | 600                | 17.1                          | 6    |
| 2020      | p-i-n            | 1.75       | 1.26                           | 490                | 18.3                          | 7    |
| 2022      | p-i-n            | 1.79       | 1.25                           | 540                | 17.6                          | 8    |
| 2022      | p-i-n            | 1.79       | 1.26                           | 530                | 17.8                          | 9    |
| 2022      | p-i-n            | 1.8        | 1.26                           | 540                | 17.7                          | 10   |
| 2022      | p-i-n            | 1.77       | 1.284                          | 486                | 17.72                         | 11   |
| 2022      | p-i-n            | 1.75       | 1.33                           | 420                | 20.3                          | 12   |
| 2023      | p-i-n            | 1.79       | 1.33<br>(Certified)            | 460                | 19.3<br>(Certified)           | 13   |
| 2023      | p-i-n            | 1.77       | 1.31 V<br>(1 cm <sup>2</sup> ) | 460                | 18.46<br>(1 cm <sup>2</sup> ) | 14   |
| 2023      | p-i-n            | 1.77       | 1.31                           | 460                | 19.33                         | 15   |
| 2023      | p-i-n            | 1.77       | 1.32                           | 450                | 19.85                         | 16   |
| This work | p-i-n            | 1.77       | 1.339<br>(Certified)           | 431                | 18.88<br>(Certified)          |      |

---

**Table S4.** Photovoltaic parameters of devices used for the 4-T all-perovskite tandem cell.

|                        | $V_{oc}$ (V) | FF (%) | $J_{sc}$ (mA·cm <sup>-2</sup> ) | PCE (%) |
|------------------------|--------------|--------|---------------------------------|---------|
| Top cell               | 1.3          | 83.06  | 16.58                           | 17.87   |
| Bottom cell            | 0.86         | 77.04  | 31.00                           | 20.53   |
| Bottom cell (filtered) | 0.82         | 79.76  | 13.85                           | 9.03    |
| 4-T tandem cell        | /            | /      | /                               | 26.90   |

---

## References

1. W. Wang, Z. Lin, S. Gao, W. Zhu, X. Song and W. Tang, *Adv. Funct. Mater.*, 2023, DOI: 10.1002/adfm.202303653.
2. C. Chen, J. Liang, J. Zhang, X. Liu, X. Yin, H. Cui, H. Wang, C. Wang, Z. Li, J. Gong, Q. Lin, W. Ke, C. Tao, B. Da, Z. Ding, X. Xiao and G. Fang, *Nano Energy*, 2021, **90**, 106608.
3. Q. Y. Chen, J. C. Luo, R. He, H. G. Lai, S. Q. Ren, Y. T. Jiang, Z. X. Wan, W. W. Wang, X. Hao, Y. Wang, J. Q. Zhang, I. Constantinou, C. L. Wang, L. L. Wu, F. Fu and D. W. Zhao, *Adv. Energy Mater.*, 2021, **11**, 2101045.
4. S. HAMADY, Python solar cell shockley-queisser limit calculator, <https://github.com/sidihamady/Shockley-Queisser>.
5. C. Chen, Z. Song, C. Xiao, D. Zhao, N. Shrestha, C. Li, G. Yang, F. Yao, X. Zheng, R. J. Ellingson, C.-S. Jiang, M. Al-Jassim, K. Zhu, G. Fang and Y. Yan, *Nano Energy*, 2019, **61**, 141-147.
6. Y. M. Xie, Z. Zeng, X. Xu, C. Ma, Y. Ma, M. Li, C. S. Lee and S. W. Tsang, *Small*, 2020, **16**, 1907226.
7. Z. Li, J. Zhang, S. F. Wu, X. Deng, F. Z. Li, D. J. Liu, C. C. Lee, F. Lin, D. Y. Lei, C. C. Chueh, Z. L. Zhu and A. K. Y. Jen, *Nano Energy*, 2020, **78**, 105377.
8. S. Qin, C. Lu, Z. Jia, Y. Wang, S. Li, W. Lai, P. Shi, R. Wang, C. Zhu, J. Du, J. Zhang, L. Meng and Y. Li, *Adv. Mater.*, 2022, **34**, 2108829.
9. W. Chen, Y. Zhu, J. Xiu, G. Chen, H. Liang, S. Liu, H. Xue, E. Birgersson, J. W. Ho, X. Qin, J. Lin, R. Ma, T. Liu, Y. He, A. M.-C. Ng, X. Guo, Z. He, H. Yan, A. B. Djurišić and Y. Hou, *Nat. Energy*, 2022, **7**, 229-237.
10. J. Wen, Y. Zhao, Z. Liu, H. Gao, R. Lin, S. Wan, C. Ji, K. Xiao, Y. Gao, Y. Tian, J. Xie, C. J. Brabec and H. Tan, *Adv. Mater.*, 2022, **34**, 2110356.
11. R. He, Z. Yi, Y. Luo, J. Luo, Q. Wei, H. Lai, H. Huang, B. Zou, G. Cui, W. Wang, C. Xiao, S. Ren, C. Chen, C. Wang, G. Xing, F. Fu and D. Zhao, *Adv. Sci.*, 2022, **9**, 2203210.
12. Q. Jiang, J. Tong, R. A. Scheidt, X. Wang, A. E. Louks, Y. Xian, R. Tirawat, A. F. Palmstrom, M. P. Hautzinger, S. P. Harvey, S. Johnston, L. T. Schelhas, B. W. Larson, E. L. Warren, M. C. Beard, J. J. Berry, Y. Yan and K. Zhu, *Science*, 2022, **378**, 1295-1300.
13. H. Chen, A. Maxwell, C. Li, S. Teale, B. Chen, T. Zhu, E. Ugur, G. Harrison, L. Grater, J. Wang, Z. Wang, L. Zeng, S. M. Park, L. Chen, P. Serles, R. A. Awni, B. Subedi, X. Zheng, C. Xiao, N. J. Podraza, T. Filleter, C. Liu, Y. Yang, J. M. Luther, S. De Wolf, M. G. Kanatzidis, Y. Yan and E. H. Sargent, *Nature*, 2023, **613**, 676-681.
14. R. He, W. Wang, Z. Yi, F. Lang, C. Chen, J. Luo, J. Zhu, J. Thiesbrummel, S. Shah, K. Wei, Y. Luo, C. Wang, H. Lai, H. Huang, J. Zhou, B. Zou, X. Yin, S. Ren, X. Hao, L. Wu, J. Zhang, J. Zhang, M. Stolterfoht, F. Fu, W. Tang and D. Zhao, *Nature*, 2023, **618**, 80-86.
15. J. Zhu, Y. Luo, R. He, C. Chen, Y. Wang, J. Luo, Z. Yi, J. Thiesbrummel, C. Wang, F. Lang, H. Lai, Y. Xu, J. Wang, Z. Zhang, W. Liang, G. Cui, S. Ren, X. Hao, H. Huang, Y.

---

Wang, F. Yao, Q. Lin, L. Wu, J. Zhang, M. Stolterfoht, F. Fu and D. Zhao, *Nat. Energy*, 2023, **8**, 714-724.

16. H. Liu, J. Dong, P. Wang, B. Shi, Y. Zhao and X. Zhang, *Adv. Funct. Mater.*, 2023, DOI: 10.1002/adfm.202303673.
